# Supplementary material for: Household Income Is Related to Dietary Fiber Intake and Dietary Acid Load in People with Type 2 Diabetes: A Cross-Sectional Study
Source: MDPI journal article supplement (doi:10.3390/nu14153229), 2022-08-07
Supplement: s1 [file s1]

## Supplementary Materials

**Table S1.** Clinical characteristics of study participants according to included and excluded participants with type 2 diabetes mellitus.

|                                          | <b>All<br/>N = 314</b> | <b>Included<br/>N = 201</b> | <b>Excluded<br/>N = 113</b> | <b><i>p</i></b> |
|------------------------------------------|------------------------|-----------------------------|-----------------------------|-----------------|
| Age (years)                              | 69.0 (9.2)             | 68.8 (8.7)                  | 69.3 (10.1)                 | 0.708           |
| Sex (men)                                | 60.5 (190)             | 63.7 (128)                  | 54.9 (62)                   | 0.158           |
| Duration of diabetes (years)             | 17.7 (11.2)            | 17.7 (10.9)                 | 17.8 (11.7)                 | 0.956           |
| Family history of diabetes (+) (no data) | 37.6 (118) (1.6 [5])   | 40.9 (81)                   | 33.3 (74)                   | 0.233           |
| Height (cm)                              | 161.5 (9.1)            | 162.2 (9.3)                 | 160.4 (8.7)                 | 0.105           |
| Body weight (kg)                         | 61.9 (11.7)            | 62.5 (11.8)                 | 60.7 (11.3)                 | 0.174           |
| Body mass index (kg/m <sup>2</sup> )     | 23.7 (3.8)             | 23.8 (3.5)                  | 23.6 (4.1)                  | 0.646           |
| SBP (mmHg)                               | 131.5 (17.7)           | 130.5 (16.3)                | 133.4 (19.9)                | 0.171           |
| DBP (mmHg)                               | 74.2 (11.9)            | 74.3 (11.5)                 | 74.2 (12.6)                 | 0.954           |
| Antihypertensive drugs (+) (no data)     | 55.1 (173) (1.6 [5])   | 61.1 (121)                  | 46.8 (52)                   | 0.021           |
| Presence of hypertension (+) (no data)   | 64.3 (202) (1.6 [5])   | 68.2 (135)                  | 60.4 (67)                   | 0.207           |
| Insulin (+) (no data)                    | 23.6 (74) (1.9 [6])    | 24.2 (48)                   | 23.6 (26)                   | 1.000           |
| Smoking (+) (no data)                    | 14.0 (44) (1.5 [5])    | 14.6 (29)                   | 13.5 (15)                   | 0.917           |
| Habit of exercise (+)                    | 51.0 (160)             | 57.7 (116)                  | 38.9 (44)                   | 0.002           |
| Education level (<12 years)              | 10.2 (32) (no data)    | 13.0 (25)                   | 13.0 (7)                    | 1.000           |
|                                          | 21.3 [67])             |                             |                             |                 |
|                                          | 60.2 (189)/            | 77.3 (150)/                 | 68.4 (39)/                  | 0.284           |
| Married status                           | 8.9 (28)/              | 11.3 (22)/                  | 10.5 (6)/                   |                 |
| (married/divorce/not                     | 6.7 (21)/              | 6.7 (13)/                   | 14.0 (8)/                   |                 |
| married/bereavement)                     | 4.1 (13)               | 4.6 (9)                     | 7.0 (4)                     |                 |
|                                          | (20.1 [63])            |                             |                             |                 |
| HbA1c (mmol/mol)                         | 54.9 (9.6)             | 55.8 (10.0)                 | 53.3 (8.9)                  | 0.032           |
| HbA1c (%)                                | 7.2 (0.9)              | 7.3 (0.9)                   | 7.0 (0.8)                   | 0.032           |
| Plasma glucose (mmol/L)                  | 8.0 (2.2)              | 8.0 (2.2)                   | 8.2 (2.4)                   | 0.412           |
| Creatinine (umol/L)                      | 78.4 (48.1)            | 75.3 (36.7)                 | 84.0 (63.4)                 | 0.128           |
| eGFR (mL/min/1.73 m <sup>2</sup> )       | 68.7 (21.4)            | 70.1 (21.3)                 | 66.3 (21.5)                 | 0.143           |
| Renal failure (+) (no data)              | 5.4 (17) (2.2 [7])     | 5.1 (10)                    | 6.4 (7)                     | 0.832           |
| Uric acid (umol/L)                       | 308.7 (77.6)           | 310.5 (73.7)                | 305.6 (84.3)                | 0.599           |
| Triglycerides (mmol/L)                   | 1.5 (0.9)              | 1.5 (0.9)                   | 1.5 (1.1)                   | 0.994           |
| HDL cholesterol (mmol/L)                 | 1.6 (0.4)              | 1.5 (0.4)                   | 1.6 (0.4)                   | 0.305           |
|                                          | 17.8 (56) (35.0        | 26.9 (54)                   | 66.7 (2)                    | 0.378           |
| Household income (high) (no data)        | [110])                 |                             |                             |                 |
| Total energy intake (kcal/day)           | 1752.1 (621.9)         | 1727.7 (509.5)              | 1795.5 (784.2)              | 0.355           |
| Energy intake (kcal/IBW kg/day)          | 30.5 (10.9)            | 39.8 (8.7)                  | 31.7 (13.9)                 | 0.137           |
| Total protein intake (g/day)             | 73.5 (30.3)            | 72.8 (27.6)                 | 74.7 (34.5)                 | 0.582           |
| Protein intake (g/IBW kg/day)            | 1.3 (0.5)              | 1.3 (0.5)                   | 1.3 (0.6)                   | 0.321           |
| Protein intake (% Energy)                | 16.8 (3.4)             | 16.8 (3.3)                  | 16.9 (3.5)                  | 0.845           |

|                                            |              |              |               |       |
|--------------------------------------------|--------------|--------------|---------------|-------|
| Animal protein intake (g/day)              | 44.9 (24.0)  | 44.6 (22.3)  | 45.3 (26.8)   | 0.804 |
| Animal protein intake (g/IBW<br>kg/day)    | 0.8 (0.4)    | 0.8 (0.4)    | 0.8 (0.5)     | 0.555 |
| Vegetable protein intake (g/day)           | 28.6 (9.8)   | 28.1 (8.7)   | 29.4 (11.7)   | 0.277 |
| Vegetable protein intake (g/IBW<br>kg/day) | 0.5 (0.2)    | 0.5 (0.1)    | 0.5 (0.2)     | 0.093 |
| Total fat intake (g/day)                   | 56.4 (24.0)  | 55.7 (21.1)  | 57.6 (28.5)   | 0.508 |
| Fat intake (g/IBW kg/day)                  | 1.0 (0.4)    | 1.0 (0.4)    | 1.0 (0.5)     | 0.274 |
| Fat intake (% Energy)                      | 29.0 (6.3)   | 28.9 (6.5)   | 29.0 (5.9)    | 0.922 |
| Total carbohydrate intake (g/day)          | 220.0 (82.2) | 215.4 (68.0) | 228.3 (102.5) | 0.184 |
| Carbohydrate intake (g/IBW<br>kg/day)      | 3.8 (1.4)    | 3.7 (1.1)    | 4.0 (1.8)     | 0.062 |
| Carbohydrate intake (% Energy)             | 50.6 (8.7)   | 50.4 (8.8)   | 51.1 (8.4)    | 0.509 |
| Dietary fiber intake (g/day)               | 12.2 (5.1)   | 12.2 (5.0)   | 12.3 (5.5)    | 0.802 |
| Carbohydrate/fiber ratio                   | 19.5 (6.9)   | 19.4 (7.1)   | 19.6 (6.4)    | 0.807 |
| Alcohol consumption (g/day)                | 7.3 (16.9)   | 7.8 (17.0)   | 6.4 (16.8)    | 0.489 |
| PRAL (mEq/day)                             | 7.1 (13.3)   | 6.2 (12.6)   | 8.8 (14.4)    | 0.098 |
| NEAP (mEq/day)                             | 49.8 (11.5)  | 49.0 (10.7)  | 51.3 (12.7)   | 0.082 |

Data was expressed as mean (standard deviation) or percentage (number). The difference between group was evaluated by Student's t-test or chi-square test. SBP, systolic blood pressure; DBP, diastolic blood pressure; eGFR, estimated glomerular filtration rate; HDL, high-density lipoprotein; IBW, ideal body weight; PRAL, potential renal acid load score; NEAP, net endogenous acid production score.
